# Supplementary material for: Novel macrolactam compound produced by the heterologous expression of a large cryptic biosynthetic gene cluster of Streptomyces rochei IFO12908
Source: Springer Nature journal article supplement (doi:10.1038/s41429-019-0265-x), 2019-12-18
Supplement: MOESM1 [file 41429_2019_265_MOESM1_ESM.pdf]

Supplementary Information

**Novel macrolactam compound produced by heterologous expression of a large cryptic biosynthetic gene cluster of *Streptomyces rochei* IFO12908**

Takuya Hashimoto<sup>1</sup>, Ikuko Kozono<sup>2</sup>, Junko Hashimoto<sup>2</sup>, Reiko Ueoka<sup>1</sup>, Noritaka Kagaya<sup>1</sup>,  
Manabu Fujie<sup>3</sup>, Noriyuki Sato<sup>3</sup>, Haruo Ikeda<sup>4</sup>, Kazuo Shin-ya<sup>\*,1,5,6</sup>

<sup>1</sup>National Institute of Advanced Industrial Science and Technology, 2-4-7 Aomi, Koto-ku, Tokyo, 135-0064, Japan.

<sup>2</sup>Japan Biological Informatics Consortium (JBIC), Tokyo Japan. 2-4-7 Aomi, Koto-ku, Tokyo, 135-0064, Japan.

<sup>3</sup>Okinawa Institute of Science and Technology Graduate University, 1919-1 Tancha, Onna-son, Kunigami-gun, Okinawa 904-0495, Japan

<sup>4</sup>Kitasato Institute for Life Sciences, Kitasato University, 1-15-1 Kitasato, Minami-ku, Sagami-hara, Kanagawa 252-0373, Japan.

<sup>5</sup>Collaborative Research Institute for Innovative Microbiology, The University of Tokyo, 1-1-1 Yayoi, Bunkyo-ku, To-kyo, 113-8657, Japan.

<sup>6</sup>Biotechnology Research Center, The University of Tokyo, 1-1-1 Yayoi, Bunkyo-ku, Tokyo, 113-8657, Japan.

## Table of Contents

### Experimental section

### Supporting table and figures.

|           |                                                                      |
|-----------|----------------------------------------------------------------------|
| Table S1  | The deduced functions of the genes in the biosynthetic gene cluster. |
| Figure S1 | Detection of JBIR-156 ( <b>1</b> ).                                  |
| Figure S2 | Proposed biosynthesis of JBIR-156.                                   |
| Figure S3 | <sup>1</sup> H-spectrum of <b>1</b> .                                |
| Figure S4 | <sup>13</sup> C spectrum of <b>1</b> .                               |
| Figure S5 | DQF-COSY spectrum of <b>1</b> .                                      |
| Figure S6 | HSQCAD spectrum of <b>1</b> .                                        |
| Figure S7 | HMBCAD spectrum of <b>1</b> .                                        |
| Figure S8 | Coupled HSQCAD spectrum of <b>1</b> .                                |

## Experimental section

### General Experimental Procedures.

Optical rotations were measured on a Horiba SEPA-500 polarimeter (Horiba, Kyoto, Japan) using a sodium lamp at a wavelength of 589 nm. UV and IR spectra were measured with a DU730 UV/Vis spectrophotometer (Beckman Coulter Japan, Tokyo, Japan) and an FT-720 spectrophotometer (Horiba) equipped with DuraSamplIR II (Horiba), respectively.  $^1\text{H}$ ,  $^{13}\text{C}$  NMR, and 2D NMR data such as double-quantum-filtered correlation spectroscopy (DQF-COSY), gradient-enhanced heteronuclear single quantum coherence with adiabatic pulses (HSQCAD), and gradient-selected heteronuclear multiple bond correlation using adiabatic pulses (HMBCAD) were collected using a Varian NMR 600 NB CL spectrometer with DMSO- $d_6$  as the solvent ( $\delta_{\text{C}}$  39.7 ppm,  $\delta_{\text{H}}$  2.49 ppm). The coupling constants ( $J$ ) are given in Hertz. Reversed-phase MPLC was carried out using Purif-Pack ODS-60 columns (Shoko Scientific Co., Ltd., Yokohama, Japan). Analytical RP-UPLC and HR-ESI-MS (positive mode) were performed using a Waters ACQUITY UPLC System (Waters, Taunton, MA in conjunction with a BEH ODS column (2.1 i.d.  $\times$  100 mm, Waters), a Waters ACQUITY UPLC photodiode array  $\lambda$  detector (Waters), and a XevoG2 Tof system (Waters). Preparative RP-HPLC was conducted using a Develosil RPAQUEOUS-AR5 C<sub>30</sub> column (20 i.d.  $\times$  150 mm, Nomura Chemical, Seto, Japan). Oligonucleotides for the polymerase chain reaction (PCR) were purchased from Life Technologies (Carlsbad, CA). Pulse field gel electrophoresis was performed with a CHEF Mapper XA System (Bio-Rad, Hercules, CA). DNA manipulation was carried out using standard methods.<sup>1</sup> Restriction enzymes and other molecular biology reagents were purchased from New England BioLabs (Ipswich, MA). PCR reactions for screening were performed with GoTaq Master Mix (Promega, Madison, WI).

### Cloning and Isolation of a BAC Clone Containing Target Gene Cluster and Transformation to Host Strain.

Genome sequencing of *Streptomyces rochei* IFO12908 strain was performed using Roche 454 GS FLX Titanium chemistry (Roche, Basel, Switzerland). The sequence was assembled using the Newbler software package. After the genome, embedded in 0.6% agarose gel, was partially digested with *Bam*HI, the resulting fragments were separated by CHEF electrophoresis in 1% agarose gel, and approximately 220-240 kb fragments were harvested from the gel. The purified DNA fragments were ligated with *Bam*HI-cut pKU518 and the ligation products were introduced into *E. coli* NEB 10-beta (New England Biolabs, Inc., MA, USA) by electroporation.<sup>2,3</sup> Each BAC clone was stored in four 384-well plates containing

Plusgrow II (100 µg/mL ampicillin and 20% glycerol) at –80 °C. Clones containing the biosynthetic gene cluster for **1** were subjected to PCR amplification using two pairs of primers corresponding to its upstream and downstream regions (F6K295\_P1\_1F: 5'-GTGGTCCAGACACGTCAGCTTC-3'/F6K295\_P1\_1R: 5'-AGGATTCGTCCGATTCTTCGACTC-3' and F6K295\_P1\_2F: 5'-GAGCACCAGCGTGACCAGAT-3'/F6K295\_P1\_2R: 5'-TACCGCTGTCACACCACAAGAGAT-3'). The amplification was performed as follows: denaturation at 95 °C for 300 s, 35 cycles of 95 °C for 30 s, 58 °C for 30 s and 72 °C for 60 s, incubation at 72 °C for 5 min then soaking at 12 °C. A clone pKU518F6K295\_P1\_P9-M23 was selected, and the inserted sequence was confirmed by end-sequencing. The pKU518F6K295\_P1\_P9-M23 was introduced into the *S. avermitilis* SUKA32 strain carrying the SAP1 vector that contains the synthetic sequence of *attB*<sub>ϕK38-1</sub>, *attB*<sub>R4</sub>, *attB*<sub>ϕBT1</sub>, *attB*<sub>ϕC31</sub>, and *attB*<sub>TG1</sub> of *S. avermitilis* MA-4680, according to the reported protocol.<sup>4</sup>

#### **Fermentation, Extraction, and Isolation.**

The obtained clone was cultivated in 50-mL test-tubes, each containing 15 mL of a seed medium consisting of 0.5% glucose, 1.5% soybean meal and 0.5% yeast extract at pH 7.5 (adjusted before sterilization). The test tubes were shaken on a reciprocal shaker (320 rpm) at 27 °C for 2 days. Aliquots (2.5 mL) of the culture were transferred into 500-mL baffled Erlenmeyer flasks containing 100 mL of a production medium consisting of 2% glycerol, 1% molasses, 0.5% casein, 0.1% polypepton, 0.4% CaCO<sub>2</sub>, (adjusted pH to 7.2 before sterilization), and were cultured on a rotary shaker (180 rpm) at 27 °C for 5 days.

The fermentation broth (1 L) was centrifuged, and the collected mycelial cake was extracted with acetone (200 mL × 3). After concentration in vacuo, the residual aqueous concentrate was partitioned between EtOAc and water (100 mL × 3). The resultant ethyl acetate layer was concentrated to dryness (321 mg). The sample was subjected to ODS RP-MPLC by using a H<sub>2</sub>O–MeOH stepwise solvent system (0%, 40%, 60%, 80%, and 100% MeOH). Fractions were monitored using the UPLC-DAD-MS system. The 80% MeOH fraction was collected and lyophilized (30.7 mg). The fraction was further purified by RP HPLC employing a C30 column, in isocratic mode with 55% CH<sub>3</sub>CN to afford 3.6 mg of **1**.

#### **JBIR-156 (1)**

[ $\alpha$ ]<sub>D</sub><sup>24</sup> –25 (c 0.02, MeOH); UV (MeOH)  $\lambda_{\max}$  (log  $\epsilon$ ) 264 nm (4.22), 303 nm (4.53), 313 nm (4.54), 348 nm (4.11); IR (ATR)  $\nu_{\max}$  3400 and 1646 cm<sup>–1</sup>; <sup>1</sup>H NMR (600 MHz) and <sup>13</sup>C NMR (150 MHz), see Table 1.

### Cytotoxicity Assays.

The cytotoxic activities of **1** against human ovarian adenocarcinoma SKOV-3 cells, malignant pleural mesothelioma Meso-1 cells and immortalized human T lymphocyte Jurkat cells were examined. SKOV-3 cells were cultured in DMEM medium supplemented with 10% fetal bovine serum, penicillin (50 U/mL) and streptomycin (50 µg/mL). Meso-1 cells were cultured in RPMI1640 medium supplemented with 10% fetal bovine serum, penicillin (50 U/mL) and streptomycin (50 µg/mL). Jurkat cells were cultured in RPMI1640 medium supplemented with 10% fetal bovine serum, penicillin (50 U/mL), streptomycin (50 µg/mL) and glutamax. All cell lines were seeded in 384-well plates at the density of 1000 cells/well in 20 µL media and incubated at 37 °C in a humidified incubator with 5% CO<sub>2</sub>. Samples were resolved in DMSO. After 4 h, two-fold dilution samples were added to the cell culture at the final concentration of 0.5% and incubated for 72 h. Cell viabilities were measured using CellTiter-Glo Luminescent Cell Viability Assay and EnVision Multilabel Plate Reader.

### References

- 1 Sambrook JF, Russell DW. Molecular Cloning: A Laboratory Manual. 3rd ed. Cold Spring Harbor: Cold Spring Harbor Laboratory Press; 2001.
2. Komatsu M, Uchiyama T, Omura S, Cane DE, Ikeda H. Genome-minimized *Streptomyces* host for the heterologous expression of secondary metabolism. Proc Natl Acad Sci U S A. 2010;107:2646-51.
3. Komatsu M, et al. Engineered *Streptomyces avermitilis* host for heterologous expression of biosynthetic gene cluster for secondary metabolites. ACS Synth Biol. 2013;2:384-96.
4. Kim JH, Komatsu M, Shin-ya K, Omura S, Ikeda H. Distribution and functional analysis of the phosphopantetheinyl transferase superfamily in *Actinomycetales* microorganisms. Proc Natl Acad Sci U S A. 2018;115:6828-33.

Table S1. The deduced functions of the genes in the biosynthetic gene cluster.

| Gene product | Amino acids (aa) | Proposed function                               | BLAST Hit protein [Origin]                                                            | Identity/<br>Similarity (%) | Accession No.  |
|--------------|------------------|-------------------------------------------------|---------------------------------------------------------------------------------------|-----------------------------|----------------|
| Orf-3        | 234              | Hypothetical protein                            | Hypothetical protein SCO0976 [Streptomyces coelicolor A3(2)]                          | 49/53                       | NP_625272.1    |
| Orf-2        | 116              | Hypothetical protein                            | Hypothetical protein SCO0977 [Streptomyces coelicolor A3(2)]                          | 90/94                       | NP_625273.1    |
| Orf-1        | 135              | Putative L-aspartate 1-decarboxylase            | Aspartate 1-decarboxylase [Streptomyces coelicolor A3(3)]                             | 95/98                       | NP_625274.1    |
| ORF C        | 253              | Type II thioesterase                            | PimI protein [Streptomyces natalensis]                                                | 51/65                       | CAC20922.1     |
| ORF A1       | 5629             | Modular polyketide synthase                     | Modular polyketide synthase [Streptomyces halstedii]                                  | 49/60                       | BAD08373.1     |
| ORF A5       | 3776             | Modular polyketide synthase                     | Modular polyketide synthase [Streptomyces halstedii]                                  | 52/64                       | BAD08360.1     |
| ORF A4       | 3544             | Modular polyketide synthase                     | Modular polyketide synthase [Streptomyces halstedii]                                  | 50/62                       | BAD08360.1     |
| ORF A3       | 1610             | Modular polyketide synthase                     | Type I polyketide synthase [Streptomyces rochei]                                      | 100/100                     | WP_086876767.1 |
| ORF A2       | 3586             | Modular polyketide synthase                     | Modular polyketide synthase [Streptomyces halstedii]                                  | 49/60                       | BAD08373.1     |
| ORF D        | 391              | Aspartate aminotransferase                      | VinF [Streptomyces halstedii]                                                         | 64/75                       | BAD08362.1     |
| ORF B1       | 496              | dTDP-4-keto-6-deoxy-L-hexose 2,3-dehydratase    | VinD [Streptomyces halstedii]                                                         | 53/66                       | BAD08363.1     |
| ORF B2       | 339              | dTDP-4-keto-6-deoxy-L-hexose 2,3-reductase      | VinE [Streptomyces halstedii]                                                         | 74/85                       | BAD08364.1     |
| ORF B3       | 326              | dTDP-glucose 4,6-dehydratase                    | dTDP-glucose 4,6-dehydratase [Micromonospora sp. ATCC 39149]                          | 69/78                       | EEP73304.1     |
| ORF E        | 518              | Non-ribosomal peptide synthetase                | VinM [Streptomyces halstedii]                                                         | 57/67                       | BAD08370.1     |
| ORF F        | 318              | Malonyl-CoA-[acyl-carrier-protein] transacylase | VinK [Streptomyces halstedii]                                                         | 53/71                       | BAD08368.1     |
| ORF G        | 427              | Glycosyltransferase                             | VinC [Streptomyces halstedii]                                                         | 45/61                       | BAD08357.1     |
| ORF B4       | 290              | Glucose-1-phosphate thymidyltransferase         | AveBIII [Streptomyces avermitilis MA-4680]                                            | 68/78                       | NP_822122.1    |
| ORF T        | 521              | Transporter                                     | Multidrug resistance efflux protein [Streptomyces avermitilis MA-4680]                | 47/62                       | NP_827958.1    |
| ORF R1       | 1067             | Transcriptional regulator                       | AtsR-like transcriptional regulator [Streptomyces griseus subsp. griseus NBRC 13350]. | 37/49                       | YP_001821581.1 |
| ORF H        | 471              | Glutamate mutase E-chain                        | VinI [Streptomyces halstedii]                                                         | 57/64                       | BAD08366.1     |
| ORF I        | 173              | Glutamate mutase S-chain                        | VinH [Streptomyces halstedii]                                                         | 51/62                       | BAD08365.1     |
| ORF J        | 441              | Decarboxylase                                   | VinO [Streptomyces halstedii]                                                         | 57/68                       | BAD08372.1     |
| ORF K        | 528              | Non-ribosomal peptide synthetase                | VinN [Streptomyces halstedii]                                                         | 62/75                       | BAD08371.1     |
| ORF L        | 82               | Peptidyl carrier protein                        | VinL [Streptomyces halstedii]                                                         | 55/68                       | BAD08369.1     |
| ORF M        | 313              | Peptidase                                       | VinJ [Streptomyces halstedii]                                                         | 67/80                       | BAD08367.1     |
| ORF R2       | 876              | Transcriptional regulator                       | OlmRII [Streptomyces avermitilis MA-4680]                                             | 33/46                       | NP_824077.1    |
| ORF B5       | 240              | N,N-dimethyltransferase                         | DesVI [Streptomyces venezuelae]                                                       | 45/59                       | AAC68678.1     |
| Orf+1        | 206              | Hypothetical protein                            | Hypothetical protein [Streptomyces coelicolor A3(2)]                                  | 73/80                       | NP_627042.1    |
| Orf+2        | 343              | Iron transporter                                | Iron transporter protein [Streptomyces avermitilis MA-4680]                           | 30/46                       | WP_010982040.1 |

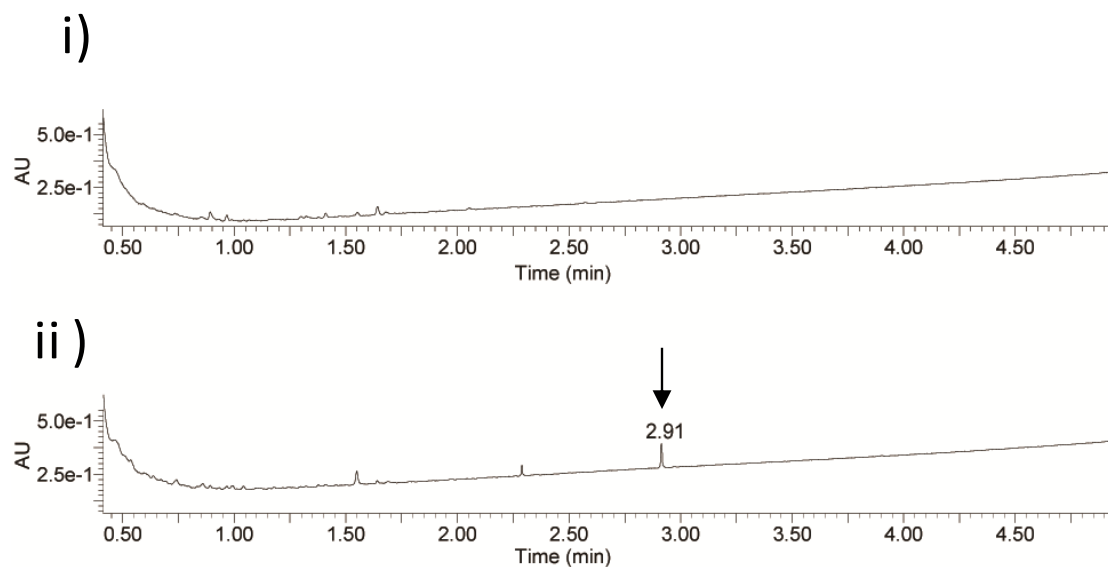

Figure S1. Detection of JBIR-156 (**1**). UPLC analysis of culture extracts from (i) *Streptomyces avermitilis* SUKA32 host strain as a negative control, and (ii) SUKA32 strain::pKU518F6K295\_P1\_P9-M23. The chromatogram was monitored at 220 nm. The peak of JBIR-156 (**1**) is indicated with a black arrow.





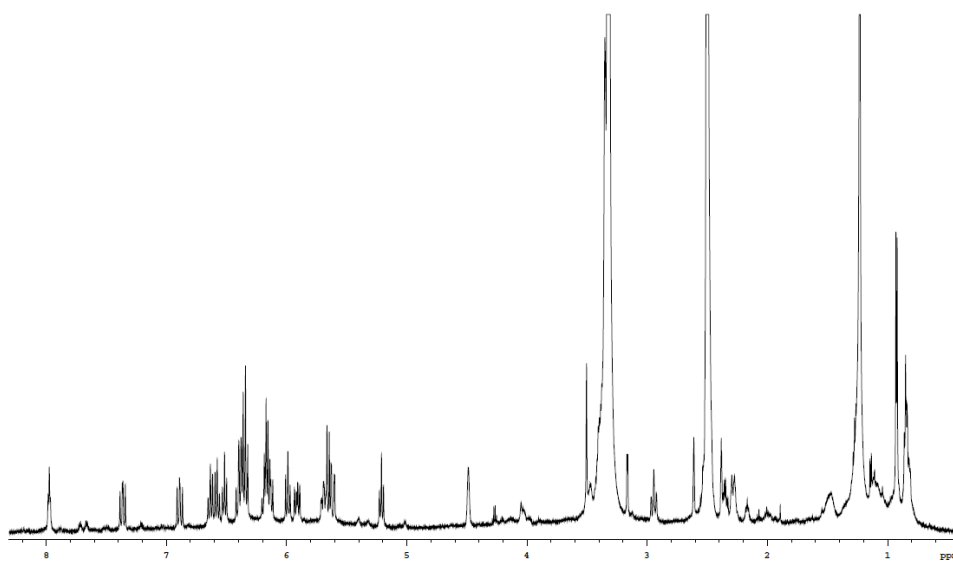

Figure S3.  $^1\text{H}$  NMR spectrum of **1**.

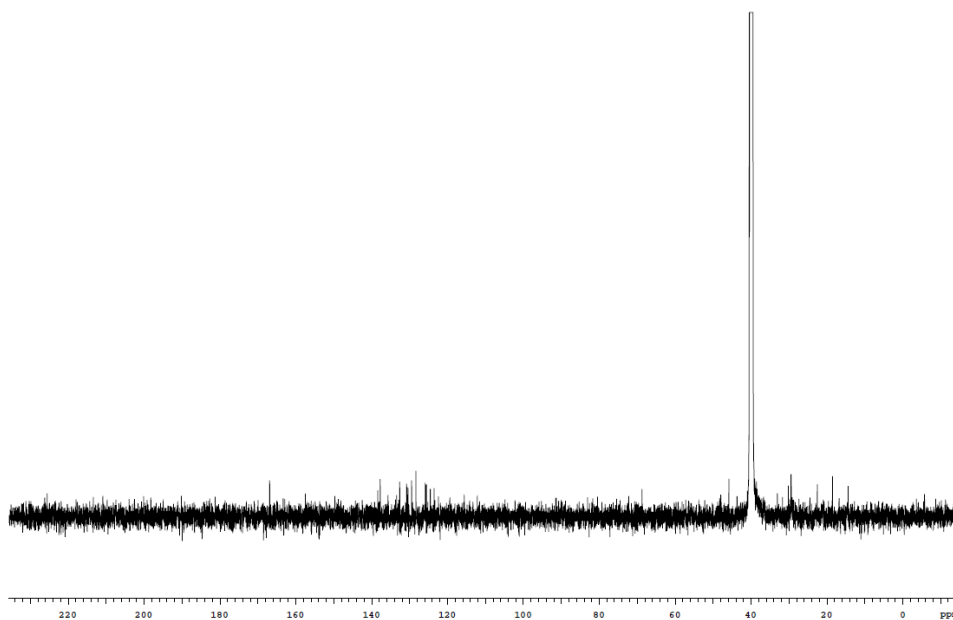

Figure S4.  $^{13}\text{C}$  NMR spectrum of **1**.

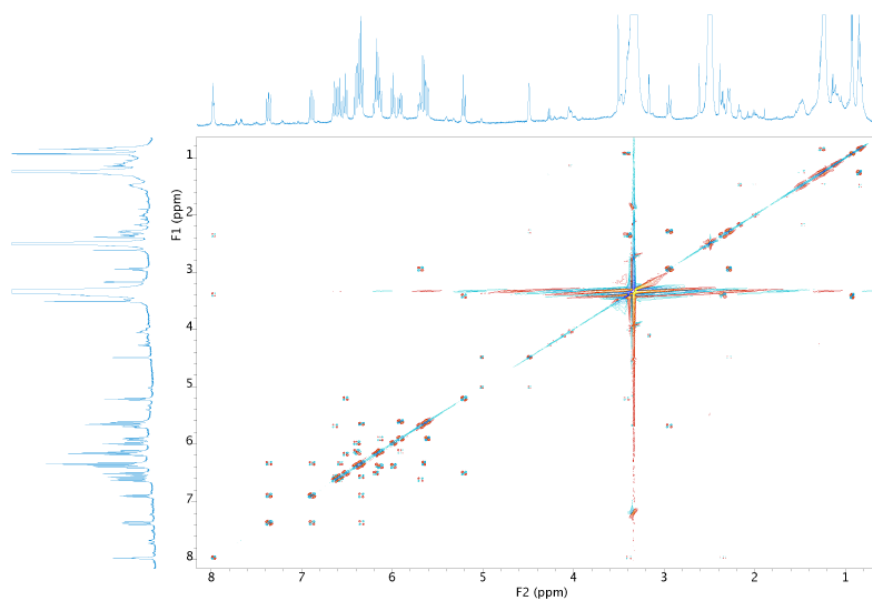

Figure S5. DQF-COSY spectrum of **1**.

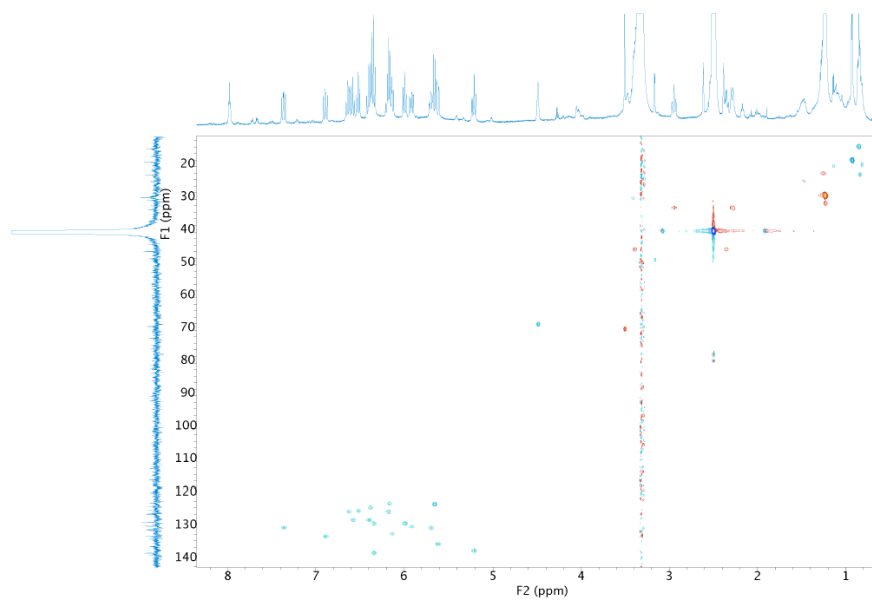

Figure S6. HSQCAD spectrum of **1**.

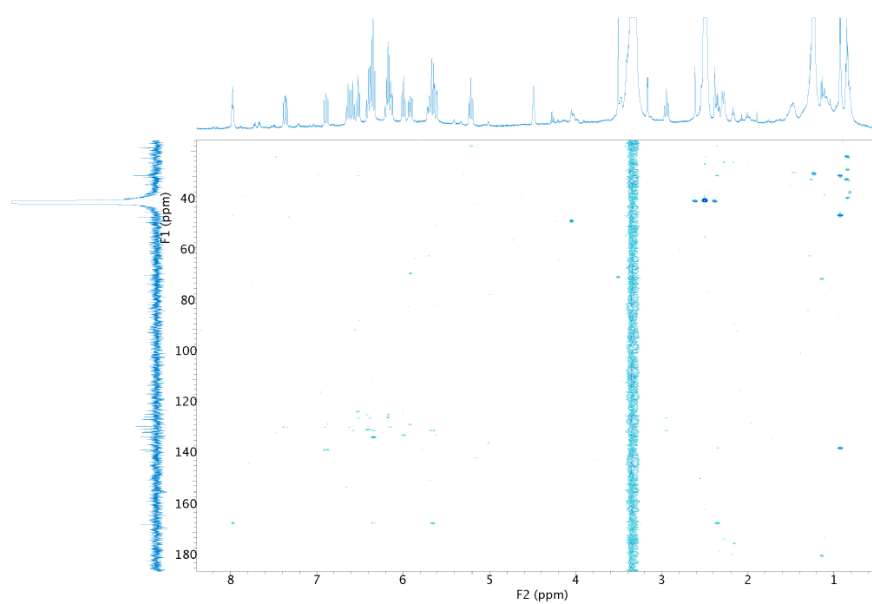

Figure S7. HMBCAD spectrum of **1**.

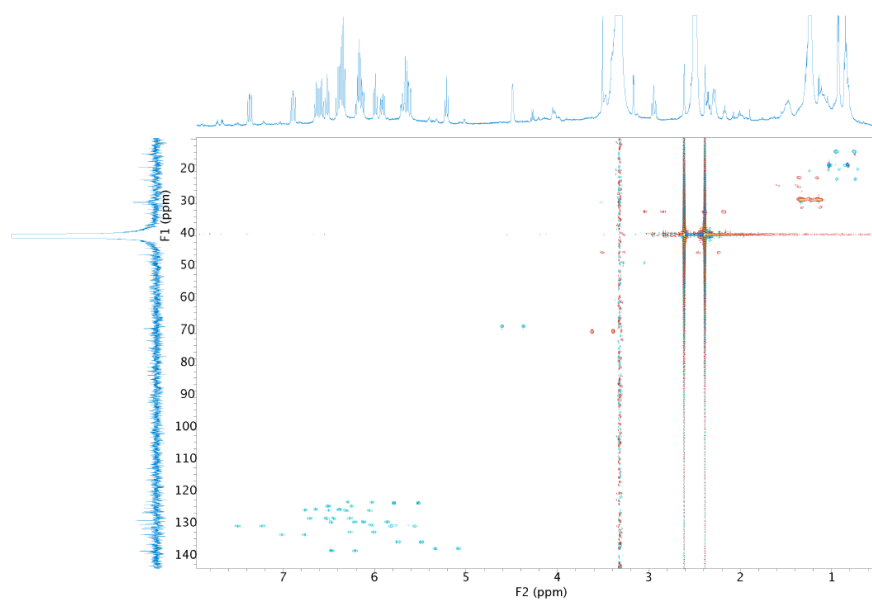

Figure S8. Coupled HSQCAD spectrum of **1**.
